# Supplementary material
Source: PubMed Central journal article supplement (PMC3430542)
Supplement: supp_112.141200_FigureS1.pdf [file supp_112.141200_FigureS1.pdf]

**A**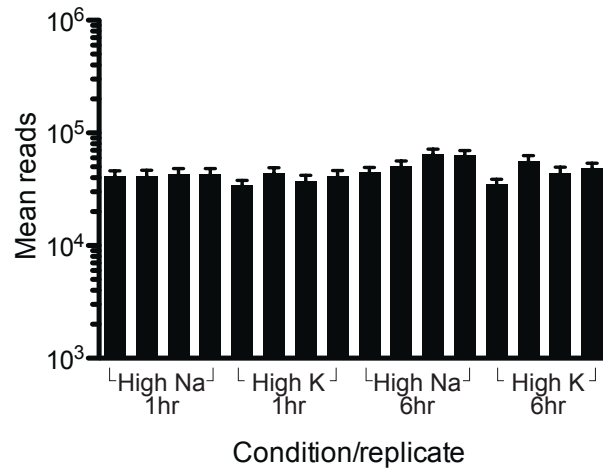**B**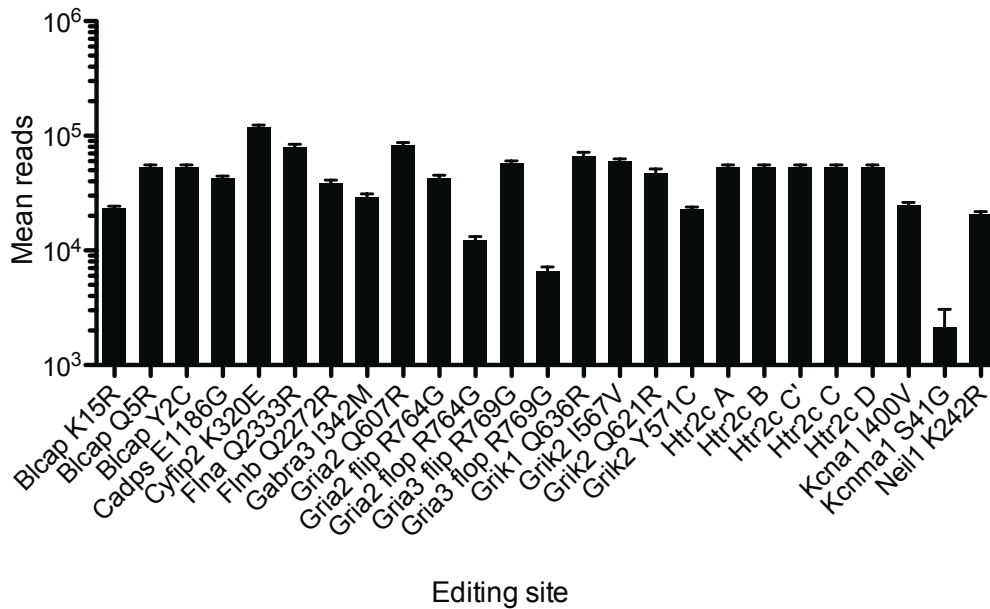

**Figure S1 Read uniformity across conditions and editing sites.** Counts of the average number of sequencing reads per editing site and per condition in one multiplexed Illumina sequencing run. **a**, Mean number of sequencing reads per condition/replicate averaged across editing sites ( $n=25$ ). In each condition in the sequencing run (High Na 1hr, High K 1hr, High Na 6hr, High K 6hr), reads counts are plotted for 4 separate biological replicates. **b**, Mean number of sequencing reads per editing site averaged across different conditions/replicates ( $n=12$ ). In both panels, error bars indicate s.e.m.
