# Supplementary material
Source: PubMed Central journal article supplement (PMC3430542)
Supplement: supp_112.141200_FigureS2.pdf [file supp_112.141200_FigureS2.pdf]

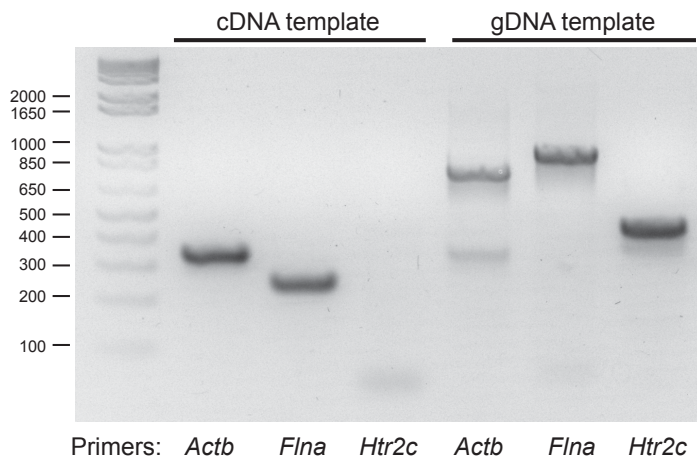

**Figure S2 Saturation PCR for gDNA contamination in cDNA.** Sample gel result from saturation PCR using 3 primers that produce different size bands depending on whether gDNA is present or not. (See Supplementary Table 1 for template-dependent band sizes.) The template used (cDNA from isolated RNA or gDNA) is labeled above the gel image and the primer is labeled below. None of the gDNA bands are present when cDNA is used as a template. This procedure was repeated for all extracted RNA to verify absence of gDNA contamination.
