# Supplementary material
Source: PubMed Central journal article supplement (PMC3430542)
Supplement: supp_112.141200_TableS1.pdf [file supp_112.141200_TableS1.pdf]

**Table S1 Primers to test cDNA for gDNA contamination**

Intron-spanning or intron-annealing primers to verify absence of gDNA in prepared cDNA libraries. *Actb* and *Flna* are exon-spanning and *Htr2c* only amplifies an intronic sequence.

| Gene         | Forward primer       | Reverse primer         | RNA band (bp) | DNA band (bp) |
|--------------|----------------------|------------------------|---------------|---------------|
| <i>Actb</i>  | CTAAGGCCAACCGTGAAAAG | GCTCGAAGTCTAGGGCAACA   | 339           | 805           |
| <i>Flna</i>  | AAAGGATGGCTCTTGTGGTG | CTATGCACCTTGGCATCAAT   | 246           | 988           |
| <i>Htr2c</i> | AACCGATCAAACGCAATGTT | CAATGCTATCATCACTGGGAAA | None          | 454           |
