# Supplementary material
Source: PubMed Central journal article supplement (PMC3430542)
Supplement: supp_112.141200_TableS2.pdf [file supp_112.141200_TableS2.pdf]

**Table S2 qRT-PCR primers for immediate early genes**

Forward and reverse primers used for quantitative reverse-transcription polymerase chain reaction (qRT-PCR) to measure expression levels of activity-induced immediate early genes *Arc* and *BDNF*.

| Gene         | Forward primer       | Reverse primer       |
|--------------|----------------------|----------------------|
| <i>Arc</i>   | CCTTCAGGGTGAGCTGAAG  | AGTCATGGAGCCGAAGTCTG |
| <i>Bdnf</i>  | GCGGCAGATAAAAAGACTGC | GCAGCCTTCCTTCGTGTAAC |
| <i>Gapdh</i> | GCATCCTGCACCACCAACTG | ACGCCACAGCTTCCAGAGG  |
