# Supplementary material
Source: PubMed Central journal article supplement (PMC3430542)
Supplement: supp_112.141200_TableS3.pdf [file supp_112.141200_TableS3.pdf]

**Table S3 Editing site sequences for primers**

Primers for amplification of short amplicons that include editing sites within a few bases of one of the primers. For some transcripts, editing sites were spaced further than could reliably be captured in a single short read: For those transcripts, multiple primer pairs were used to capture all editing sites. *Italics* indicates sequence/primer closest to editing site(s).

| Gene      | Forward primer                | Reverse primer                  |
|-----------|-------------------------------|---------------------------------|
| Blcap (1) | <i>CTGCCCGTCTCTCATC</i>       | AATCGGAGCAGTGGTACAGG            |
| Blcap (2) | <i>GCCCGGCAGAGATCATGT</i>     | CAGGAAGACCAGGGCACATA            |
| Cadps     | <i>GGATGTCTTCGTGATAAGGTC</i>  | CCGATTTTGAATGGTCTCAT            |
| Cyfp2     | AGCTGGATGCCAAGAAGAGA          | <i>CTCTTCATAGTGAGCACTGGTCT</i>  |
| Flna      | <i>CGCCGCCTTACTGTTTCTAGT</i>  | GGATGAAACGCACAGCATA             |
| Flnb      | <i>GCTGCCTCACTGTTCTGAGC</i>   | CATTCTCATGGGGATGAAG             |
| Gabra3    | GGCTACTTTGTCATCCAGACC         | <i>GAAAATACAAAGGCATAACAGACG</i> |
| Gria2 (1) | <i>TTTCCTTGGGTGCCTTTATG</i>   | CTTTCGATGGGAGACACCAT            |
| Gria2 (2) | <i>CATCGCCACACCTAAAGGAT</i>   | CAATCAAAGCCACCAGCATT            |
| Gria3     | <i>GCAACCCCTAAAGGCTCAG</i>    | TATAGAACACGCCTGCCACA            |
| Grik1     | <i>TGGAGTTGGAGCTCTCATGC</i>   | ATGGGGGATTCCATTCTTTC            |
| Grik2 (1) | <i>TCTCCCCTGATATCTGGATGTA</i> | AGAGCTCCAACCTCAAACCA            |
| Grik2 (2) | ATGGAATGGAATGGTTCGTG          | <i>GCACACAAC TGACACCCAAG</i>    |
| Grik2 (3) | <i>TGGAGTTGGAGCTCTCATGC</i>   | ATGCGTTCCACAGTCAGAAA            |
| Htr2c (1) | <i>ATCGCTGGACCGGTATGTAG</i>   | TCACGAACACTTTGCTTTCG            |
| Htr2c (2) | AGATATTTGTCCCCGTCTG           | <i>GAATTGAACCGGCTATGCTC</i>     |
| Kcna1     | <i>CATCGCTGGTGTGCTGAC</i>     | CCTGCCTGTAGTGGGCTATG            |
| Kcnma1    | CAGCAGTAGCAGCAACATGG          | <i>AAGAAGAGGACGCGTCTAGG</i>     |
| Neil1     | TCTAGAGGCCCTGCAACAGT          | <i>TTCTCTCCACGCTCTGG</i>        |
