# Supplementary material
Source: PubMed Central journal article supplement (PMC3430542)
Supplement: supp_112.141200_TableS4.pdf [file supp_112.141200_TableS4.pdf]

**Table S4 Sequences for universal primers**

Common primers used for attaching barcodes and sequencing adaptors. The first two primers are used in the first round of pre-sequencing PCR. The last two primers are used in the second round of pre-sequencing PCR.

| Primer/purpose                                                             | Sequence                                                    |
|----------------------------------------------------------------------------|-------------------------------------------------------------|
| Forward common<br>(followed by barcode and site-specific forward sequence) | CGACGCTCTCCGATCT                                            |
| Reverse common<br>(follows site-specific reverse sequence)                 | CATACGAGCTCTCCGATCT                                         |
| Forward primer to attach sequencing adaptor                                | AATGATACGGCGACCACCGAGATCTACACTCTTCCCTACAG<br>ACGCTCTCCGATCT |
| Reverse primer to attach sequencing adaptor                                | CAAGCAGAAGACGGCATAACGAGCTCTCCGATCT                          |
