# Supplementary material
Source: PubMed Central journal article supplement (PMC3430542)
Supplement: supp_112.141200_TableS5.pdf [file supp_112.141200_TableS5.pdf]

**Table S5 Multiplex sequencing barcodes**

Barcodes used to pool multiple experimental conditions and/or replicates into a single Illumina flowcell lane. All barcodes differ by at least 2 nucleotides.

| Barcodes |      | Barcodes |      |
|----------|------|----------|------|
| 1        | CCTC | 7        | GGCA |
| 2        | ACCA | 8        | ATCC |
| 3        | TATA | 9        | GTCG |
| 4        | GACC | 10       | AGCT |
| 5        | CTTA | 11       | CAGT |
| 6        | TGTC | 12       | TCAG |
