# Supplementary material
Source: PubMed Central journal article supplement (PMC3430542)
Supplement: supp_112.141200_TableS6.pdf [file supp_112.141200_TableS6.pdf]

**Table S6 Differences in A-to-I RNA editing for all treatments**

Mean difference in editing levels (fraction inosine) between indicated treatment and matched control. Significant differences ( $p < 0.05$ ,  $n = 4$  cultures, two-sample unpaired  $t$ -test, Benjamini-Hochberg false-discovery rate correction) are indicated by **bold text**.

| Site             | K 1hr vs. Na 1hr |           | K 6hr vs. Na 6hr |           | K+EGTA 6hr vs. Na 6hr |           | TTX 6hr vs. Na 6hr |           |
|------------------|------------------|-----------|------------------|-----------|-----------------------|-----------|--------------------|-----------|
|                  | <i>Mean</i>      | <i>SE</i> | <i>Mean</i>      | <i>SE</i> | <i>Mean</i>           | <i>SE</i> | <i>Mean</i>        | <i>SE</i> |
| Blcap K15R       | -0.02            | 0.01      | -0.01            | 0.01      | 0.01                  | 0.01      | <b>0.04</b>        | 0.01      |
| Blcap Q5R        | 0.00             | 0.01      | <b>-0.03</b>     | 0.01      | 0.01                  | 0.01      | <b>0.05</b>        | 0.01      |
| Blcap Y2C        | -0.01            | 0.02      | <b>-0.05</b>     | 0.01      | -0.01                 | 0.01      | <b>0.06</b>        | 0.01      |
| Cadps E1186G     | -0.01            | 0.01      | 0.00             | 0.02      | -0.01                 | 0.01      | 0.00               | 0.01      |
| Cytip2 K320E     | -0.01            | 0.01      | <b>-0.11</b>     | 0.01      | 0.00                  | 0.01      | <b>0.09</b>        | 0.01      |
| Flna Q2333R      | 0.01             | 0.01      | <b>-0.03</b>     | 0.00      | 0.00                  | 0.00      | 0.00               | 0.00      |
| Flnb Q2272R      | -0.05            | 0.03      | <b>-0.12</b>     | 0.03      | 0.00                  | 0.01      | -0.02              | 0.01      |
| Gabra3 I342M     | 0.01             | 0.05      | -0.05            | 0.03      | 0.02                  | 0.02      | 0.21               | 0.11      |
| Gria2 Q607R      | 0.00             | 0.00      | 0.00             | 0.00      | 0.00                  | 0.00      | 0.00               | 0.00      |
| Gria2 flip R764G | -0.01            | 0.01      | <b>-0.09</b>     | 0.02      | 0.03                  | 0.02      | <b>0.11</b>        | 0.02      |
| Gria2 flop R764G | -0.07            | 0.03      | <b>-0.17</b>     | 0.03      | 0.02                  | 0.03      | <b>0.09</b>        | 0.02      |
| Gria3 flip R769G | -0.02            | 0.02      | -0.04            | 0.02      | 0.01                  | 0.01      | <b>0.05</b>        | 0.01      |
| Gria3 flop R769G | 0.09             | 0.05      | -0.02            | 0.06      | 0.00                  | 0.02      | 0.02               | 0.03      |
| Grik1 Q636R      | 0.03             | 0.04      | -0.01            | 0.03      | 0.02                  | 0.02      | 0.02               | 0.01      |
| Grik2 I567V      | 0.00             | 0.01      | <b>-0.05</b>     | 0.02      | 0.01                  | 0.01      | 0.01               | 0.01      |
| Grik2 Q621R      | 0.00             | 0.03      | <b>-0.05</b>     | 0.01      | 0.00                  | 0.01      | 0.00               | 0.01      |
| Grik2 Y571C      | 0.00             | 0.01      | -0.02            | 0.02      | 0.01                  | 0.01      | <b>0.06</b>        | 0.01      |
| Htr2c A          | 0.07             | 0.03      | 0.01             | 0.04      | -0.03                 | 0.02      | -0.01              | 0.02      |
| Htr2c B          | 0.02             | 0.04      | 0.02             | 0.05      | -0.01                 | 0.02      | -0.01              | 0.03      |
| Htr2c C'         | -0.01            | 0.02      | -0.03            | 0.02      | -0.01                 | 0.01      | -0.01              | 0.01      |
| Htr2c C          | -0.03            | 0.06      | 0.02             | 0.06      | -0.01                 | 0.02      | -0.05              | 0.02      |
| Htr2c D          | -0.03            | 0.08      | 0.02             | 0.04      | 0.02                  | 0.02      | -0.02              | 0.02      |
| Kcna1 I400V      | -0.01            | 0.03      | -0.05            | 0.02      | 0.00                  | 0.01      | 0.01               | 0.01      |
| Kcnma1 S41G      | 0.00             | 0.01      | 0.00             | 0.01      | 0.00                  | 0.01      | <b>0.02</b>        | 0.01      |
| Neil1 K242R      | 0.00             | 0.00      | 0.00             | 0.00      | -0.01                 | 0.01      | 0.00               | 0.01      |

| Site             | TTX 48hr vs. NBA 48 hr |           | Bic 48hr vs. NBA 48hr |           |
|------------------|------------------------|-----------|-----------------------|-----------|
|                  | <i>Mean</i>            | <i>SE</i> | <i>Mean</i>           | <i>SE</i> |
| Blcap K15R       | 0.00                   | 0.01      | 0.01                  | 0.01      |
| Blcap Q5R        | -0.01                  | 0.01      | -0.02                 | 0.01      |
| Blcap Y2C        | 0.00                   | 0.01      | -0.02                 | 0.01      |
| Cadps E1186G     | <b>-0.03</b>           | 0.01      | <b>0.02</b>           | 0.00      |
| Cyfp2 K320E      | <b>-0.10</b>           | 0.01      | 0.02                  | 0.01      |
| Flna Q2333R      | 0.00                   | 0.00      | 0.00                  | 0.00      |
| Flnb Q2272R      | <b>-0.02</b>           | 0.01      | -0.01                 | 0.01      |
| Gabra3 I342M     | -0.06                  | 0.04      | -0.03                 | 0.02      |
| Gria2 Q607R      | 0.00                   | 0.00      | 0.00                  | 0.00      |
| Gria2 flip R764G | <b>-0.11</b>           | 0.01      | <b>0.06</b>           | 0.01      |
| Gria2 flop R764G | <b>-0.10</b>           | 0.01      | <b>0.06</b>           | 0.01      |
| Gria3 flip R769G | <b>-0.14</b>           | 0.02      | -0.02                 | 0.02      |
| Gria3 flop R769G | -0.16                  | 0.06      | 0.01                  | 0.03      |
| Grik1 Q636R      | 0.07                   | 0.02      | 0.03                  | 0.01      |
| Grik2 I567V      | <b>-0.14</b>           | 0.01      | 0.00                  | 0.01      |
| Grik2 Q621R      | <b>-0.12</b>           | 0.01      | <b>-0.03</b>          | 0.01      |
| Grik2 Y571C      | <b>-0.13</b>           | 0.02      | -0.03                 | 0.02      |
| Htr2c A          | 0.04                   | 0.02      | -0.05                 | 0.02      |
| Htr2c B          | <b>0.08</b>            | 0.02      | -0.04                 | 0.03      |
| Htr2c C'         | 0.00                   | 0.01      | <b>0.01</b>           | 0.00      |
| Htr2c C          | <b>-0.07</b>           | 0.02      | 0.01                  | 0.03      |
| Htr2c D          | -0.01                  | 0.06      | <b>0.09</b>           | 0.02      |
| Kcna1 I400V      | <b>-0.04</b>           | 0.01      | <b>0.03</b>           | 0.01      |
| Kcnma1 S41G      | -0.01                  | 0.00      | -0.01                 | 0.01      |
| Neil1 K242R      | 0.00                   | 0.00      | 0.00                  | 0.00      |
